# Supplementary material for: Validation of Fecal Glucocorticoid Metabolites as Non-Invasive Markers for Monitoring Stress in Common Buzzards (Buteo buteo)
Source: MDPI journal article supplement (doi:10.3390/ani14081234), 2024-04-19

# Validation of Fecal Glucocorticoid Metabolites as Non-Invasive Markers for Monitoring Stress in Common Buzzards (*Buteo buteo*)

Lara-Luisa Grundei <sup>1,\*</sup>, Tanja E. Wolf <sup>2,3</sup>, Florian Brandes <sup>4</sup>, Karolin Schütte <sup>4</sup>, Fritjof Freise <sup>5</sup>, Ursula Siebert <sup>6</sup>, Chadi Touma <sup>2</sup> and Michael Pees <sup>1</sup>

<sup>1</sup> Department of Small Mammal, Reptile and Avian Medicine and Surgery, University of Veterinary Medicine Hannover, Foundation, Bünteweg 9, 30559 Hannover, Germany

<sup>2</sup> Department of Behavioral Biology, School of Biology/Chemistry, Osnabrück University, Barbarastr. 11, 49076 Osnabrück, Germany

<sup>3</sup> Mammal Research Institute, Faculty of Natural and Agricultural Sciences, University of Pretoria, Pretoria, 0028 South Africa

<sup>4</sup> Wildlife Rescue and Conservation Center, Hohe Warte 1, 31553 Sachsenhagen, Germany

<sup>5</sup> Department of Biometry, Epidemiology and Information Processing, University of Veterinary Medicine Hannover, Foundation, Bünteweg 2, 30559 Hannover, Germany

<sup>6</sup> Institute of Terrestrial and Aquatic Wildlife Research, University of Veterinary Medicine Hannover, Foundation, Bischofsholer Damm 15, 30173 Hannover, Germany

\* Correspondence: lara-luisa.grundei@tiho-hannover.de

## Supplementary Materials

**Table S1:** Results of blood examination (n=6) in female (F1, F2, F3) and male (M1, M2, M3) Common Buzzards.

| Comprehensive metabolic panel (CMP) | Standard value  | F1      | F2      | F3      | M1      | M2      | M3      |
|-------------------------------------|-----------------|---------|---------|---------|---------|---------|---------|
| <i>a</i> -Amylase                   | - U/l           | 277.00  | 403.00  | 682.00  | 354.00  | 900.00  | 900.00  |
| Cholinesterase                      | 840-1702 U/l    | 2706.00 | 3780.00 | 3897.00 | 2922.00 | 2447.00 | 2385.00 |
| Bile acids                          | 20-118 µmol/l   | 2.52    | 19.71   | 13.51   | 3.90    | 7.15    | 3.20    |
| Aspartate aminotransferase          | 50-105 U/l      | 463.80  | 716.10  | 843.90  | 355.80  | 439.90  | 329.90  |
| Creatine kinase                     | 357-850 U/l     | 970.00  | 1022.00 | 5052.00 | 560.00  | 1338.00 | 1808.00 |
| Lactate dehydrogenase               | 625-1210 U/l    | 398.80  | 560.00  | 930.70  | 357.00  | 632.30  | 316.20  |
| Total Protein                       | 25-40 g/l       | 36.00   | 37.20   | 43.50   | 30.40   | 28.10   | 36.70   |
| Glutamate dehydrogenase             | - U/l           | 3.50    | 1.60    | 22.20   | 0.20    | 4.70    | 0.40    |
| Uric Acid                           | 326-675 µmol/l  | 405.00  | 691.00  | 696.00  | 132.00  | 221.00  | 232.20  |
| Cholesterol                         | 3.9-10.5 mmol/l | 7.10    | 7.80    | 11.90   | 6.60    | 11.90   | 8.00    |
| Triglycerides                       | - mmol/l        | 1.23    | 1.59    | 1.14    | 0.74    | 0.60    | 0.74    |

|                   |                 |        |        |        |        |        |        |
|-------------------|-----------------|--------|--------|--------|--------|--------|--------|
| <i>Phosphorus</i> | 0.77-2.1 mmol/l | 0.50   | 0.40   | 0.20   | 0.20   | 0.40   | 0.40   |
| <i>Calcium</i>    | 2.1-2.56 mmol/l | 2.40   | 2.30   | 2.40   | 2.00   | 2.20   | 2.30   |
| <i>Sodium</i>     | 153-164 mmol/l  | 161.00 | 155.00 | 156.00 | 159.00 | 166.00 | 150.00 |
| <i>Potassium</i>  | 0.9-1.7 mmol/l  | 1.90   | 2.70   | 3.20   | 2.20   | 3.00   | 3.60   |

**Table S2:** Results of X-rays for female (F1, F2, F3) and male (M1, M2, M3) Common Buzzards (n=6); note small circular radiopaque artefact on the X-ray plate.

| <i>Animal ID</i> | <i>Laterolateral</i>                                                               | <i>Ventrodorsal</i>                                                                 |
|------------------|------------------------------------------------------------------------------------|-------------------------------------------------------------------------------------|
| F1               |  |  |

F2

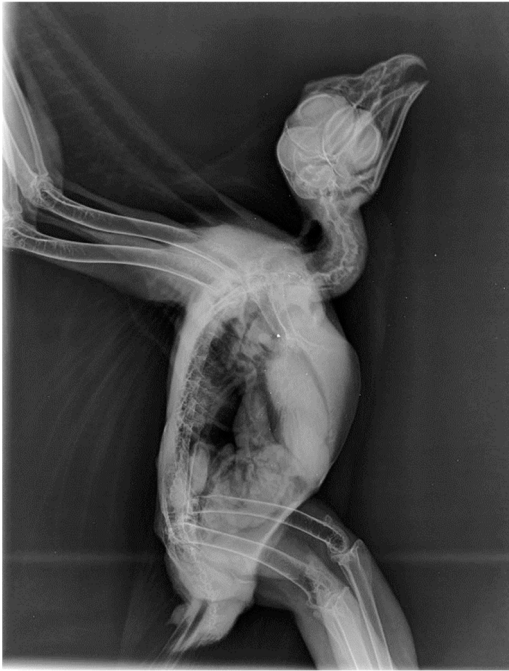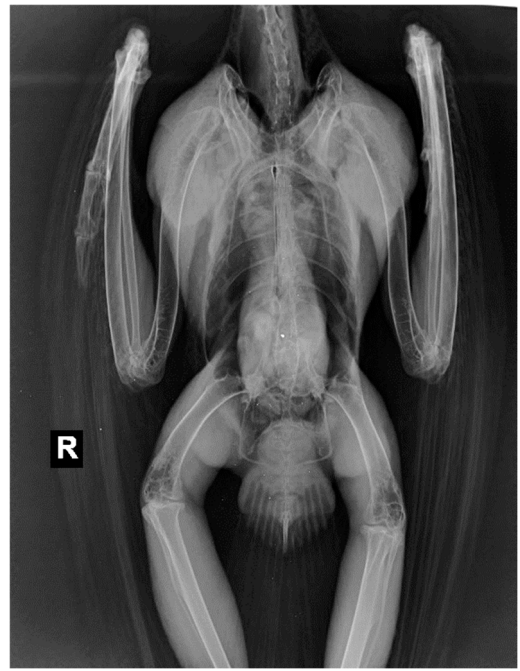

F3

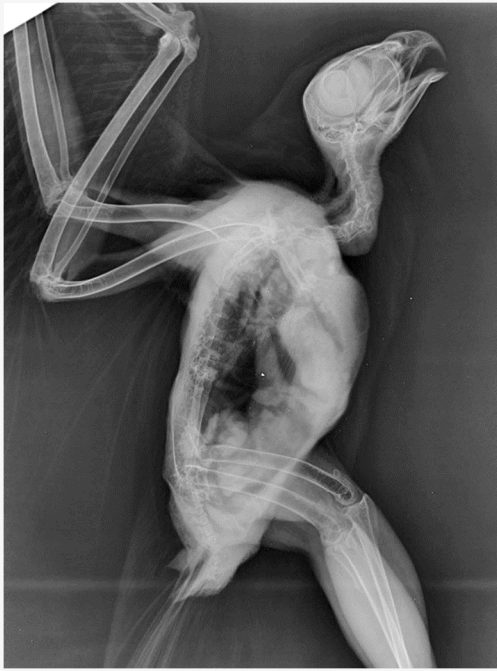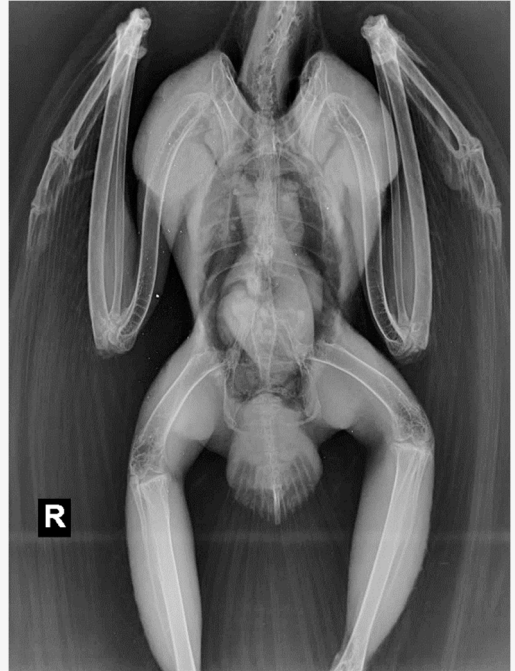

M1

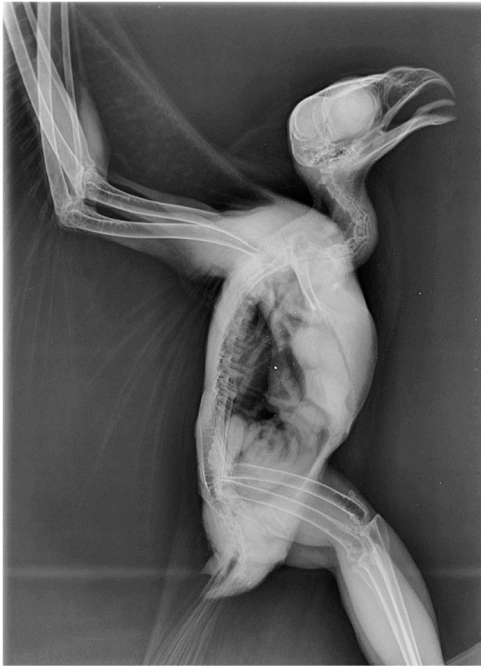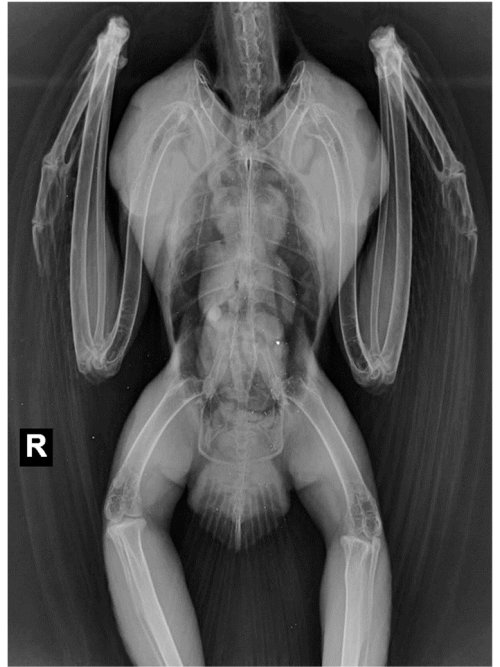

M2

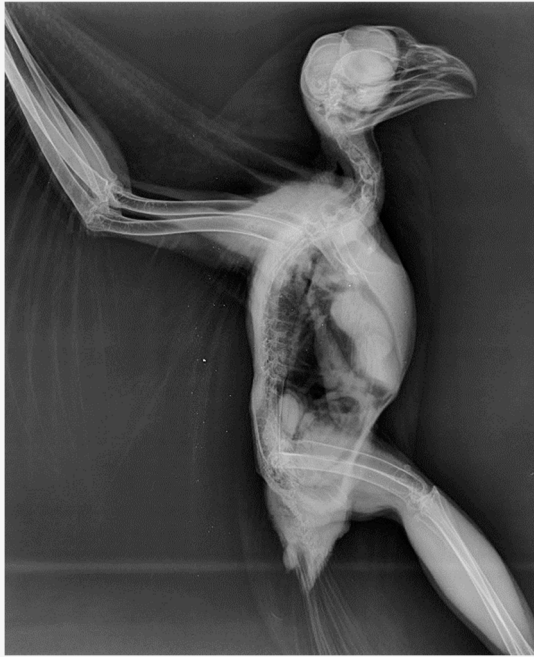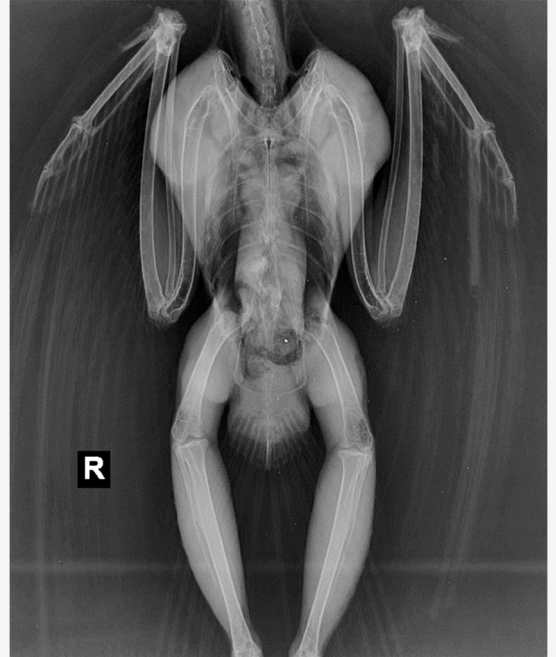

M3

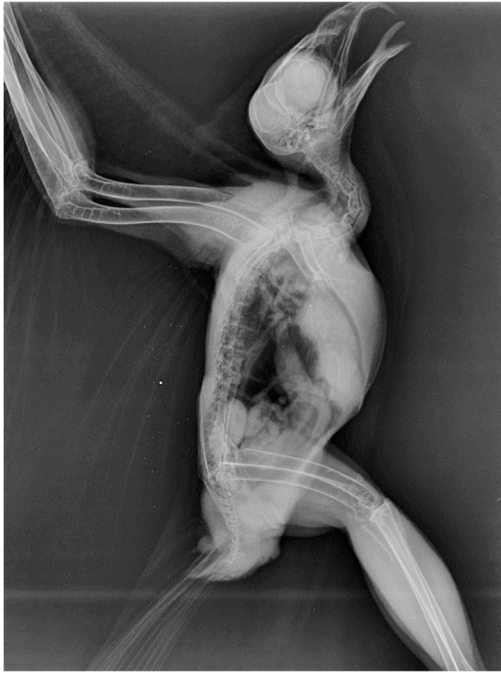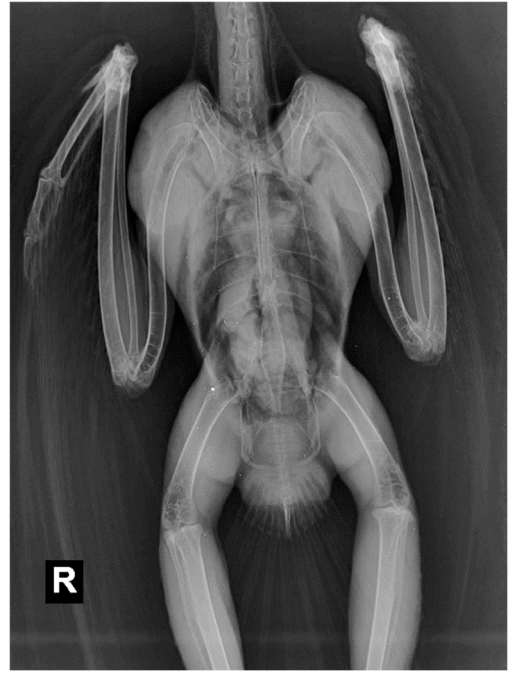

Supplement: s1 [file s1]
